# Supplementary material for: Reassessing the Role of Brain Tumor Biopsy in the Era of Advanced Surgical, Molecular, and Imaging Techniques—A Single-Center Experience with Long-Term Follow-Up
Source: MDPI journal article supplement (doi:10.3390/jpm11090909), 2021-09-12
Supplement: s1 [file s1]

**Supplementary Table SI. Demographic data of 93 patients operated upon for brain biopsy**

|                                                                       |                   |
|-----------------------------------------------------------------------|-------------------|
| <i>n</i>                                                              | 93                |
| Age (years)<br>median<br>range                                        | 64<br>18-82       |
| Sex<br>Male (%)<br>Female (%)                                         | 60.2%<br>39.8%    |
| Location of the lesion<br>deep-seated (%)<br>diffuse/multicentric (%) | 71%<br>29%        |
| Preoperative KPS<br>80-100<br>60-70<br><60                            | 35%<br>53%<br>12% |
| Follow-up (months)<br>median<br>range                                 | 29<br>1-78        |

**Supplementary Table SII. Prognostic factors for overall survival among HGG and PCNSL patients treated with needle biopsy**

| Parameter                                 | Univariate analysis* |           | Multivariate analysis <sup>#</sup> |           |
|-------------------------------------------|----------------------|-----------|------------------------------------|-----------|
|                                           | median OS (mos)      | <i>p</i>  | Hazard Ratio                       | <i>p</i>  |
| <b>Age</b><br>( $<70$ vs $\geq 70$ years) | 4.5 vs 5             | 0.8791    | 0.812<br>(0.448-1.475)             | 0.4945    |
| <b>KPS</b><br>( $\geq 70$ vs $<70$ )      | 5.5 vs 4             | 0.1737    | 0.553<br>(0.285-1.073)             | 0.0798    |
| <b>Site</b><br>(deep vs diffuse)          | 5 vs 4.5             | 0.3657    | 0.746<br>(0.421-1.321)             | 0.3144    |
| <b>Histology</b><br>(HGG vs PCNSL)        | 5 vs 4.5             | 0.4140    | 1.558<br>(0.674-3.601)             | 0.2997    |
| <b>Complications</b><br>(no vs yes)       | 5 vs 1.5             | 0.0130    | 0.481<br>(0.165-1.407)             | 0.1813    |
| <b>Adjuvant therapy</b><br>(yes vs no)    | 6.5 vs 1.5           | $<0.0001$ | 0.184<br>(0.093-0.364)             | $<0.0001$ |

Table notes: HGG, high-grade glioma; KPS, Karnofsky performance status; OS, overall survival; PCNSL, primary central nervous system lymphoma. \*, Kaplan-Meier analysis using log-rank test; <sup>#</sup>, Cox analysis.
